# Supplementary material for: Polyoxometalate-based metallogels as anode materials for lithium ion batteries
Source: Royal Society of Chemistry journal article supplement (doi:10.1039/c9dt01750j), 2019-01-01
Supplement: c9dt01750j1.pdf [file c9dt01750j1.pdf]

## **Polyoxometalate based metallogels as anode materials for lithium ion batteries**

Xing Meng, Hai-Ning Wang\*, Yan-Hong Zou, Lu-Song Wang and Zi-Yan Zhou\*

*School of Chemistry and Chemical Engineering, Shandong University of Technology,*

*Zibo, Shandong, 255049, P. R. China.*

\*Corresponding author

Email:wanghn913@foxmail.com

## Material characterization

The PXRD patterns were collected on a D/max 2500 VL/PC diffractometer (Japan) equipped with graphite monochromatized Cu  $K_{\alpha}$  radiation ( $\lambda = 1.54060 \text{ \AA}$ ). The FTIR was collected on a Nexus 670 spectrometer. The TGA was carried out by using a DSC 800 from PerkinElmer under  $N_2$  flowing with a heating rate of  $10 \text{ }^{\circ}\text{C min}^{-1}$  from room temperature to  $700 \text{ }^{\circ}\text{C}$ . The TEM and HRTEM images were performed on JEOL-2100F apparatus and JEOL JSM-6700 M scanning electron microscope, respectively. The EDS were performed on JSM-5160LV-Vantage typed energy spectrometer. XPS measurements was collected on scanning X-ray microprobe (PHI 5000 Versa, ULAC-PHI, Inc.) using excitation energy of  $1486.6 \text{ eV}$  (Al  $K_{\alpha}$ ) and the C1s line at  $284.8 \text{ eV}$  as energy referencing.

## Electrochemical characterization

To prepare working electrode, active materials, carbon black and poly (vinylidene fluoride) (PVDF) with a weight ratio of 7:2:1 were pasted on a piece of Cu foil. The active materials loading for the electrode was around  $1 \text{ mg}$ . The half-coin cells were assembled in an argon filled glove box utilizing a Li metal as the negative electrode, a solution of  $1 \text{ M LiPF}_6$  in ethylene carbonate (EC), dimethyl carbonate (DMC) (1:1 in Volume) as the electrolyte and a Celgard 2400 membrane as separator. The galvanostatic charge/discharge measurement was conducted by a LAND CT2001A multichannel battery between  $0.01$  and  $3.0 \text{ V}$ . Electrochemical impedance spectra (EIS) measurements and CV were conducted on CHI 660D (Shanghai, China) electrochemical workstation. The conductivity of samples pellets was measured with a two-probe method using Keithley 4200. The pellets of samples were pressed at a pressure of  $\approx 1 \text{ GPa}$ .

## Synthesis of MOGs

$\text{FeCl}_3 \cdot 6\text{H}_2\text{O}$  ( $540 \text{ mg}$ ,  $2 \text{ mmol}$ ), were dissolved in ethonal ( $2 \text{ mL}$ ), forming homogenous solution (solution A). Then  $\text{H}_3\text{BTC}$  ( $84 \text{ mg}$ ,  $0.4 \text{ mmol}$ ) and a certain quality of  $\text{PMo}_{12}$  ( $0.05 \text{ mmol}$ ,  $0.1 \text{ mmol}$ , or  $0.3 \text{ mmol}$ ) were dissolved in ethonal ( $2 \text{ mL}$ ) (solution B). Solution B was added dropwisely into solution A, and place it alone.

Brown MOGs were obtained, and filtered out, then washed with distilled water and ethanol for 6 times to remove the remaining reactants. The remaining precipitate was obtained after drying at 60 °C for 24 h.

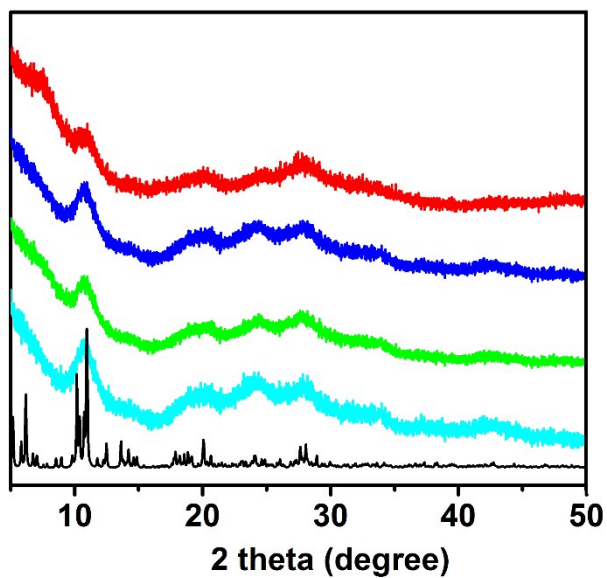

**Fig. S1** PXRD patterns of simulated MIL-100 (black), FeBTC (light blue), PMo<sub>12</sub>@FeBTC-1 (green), PMo<sub>12</sub>@FeBTC-2 (blue), and PMo<sub>12</sub>@FeBTC-3 (red).

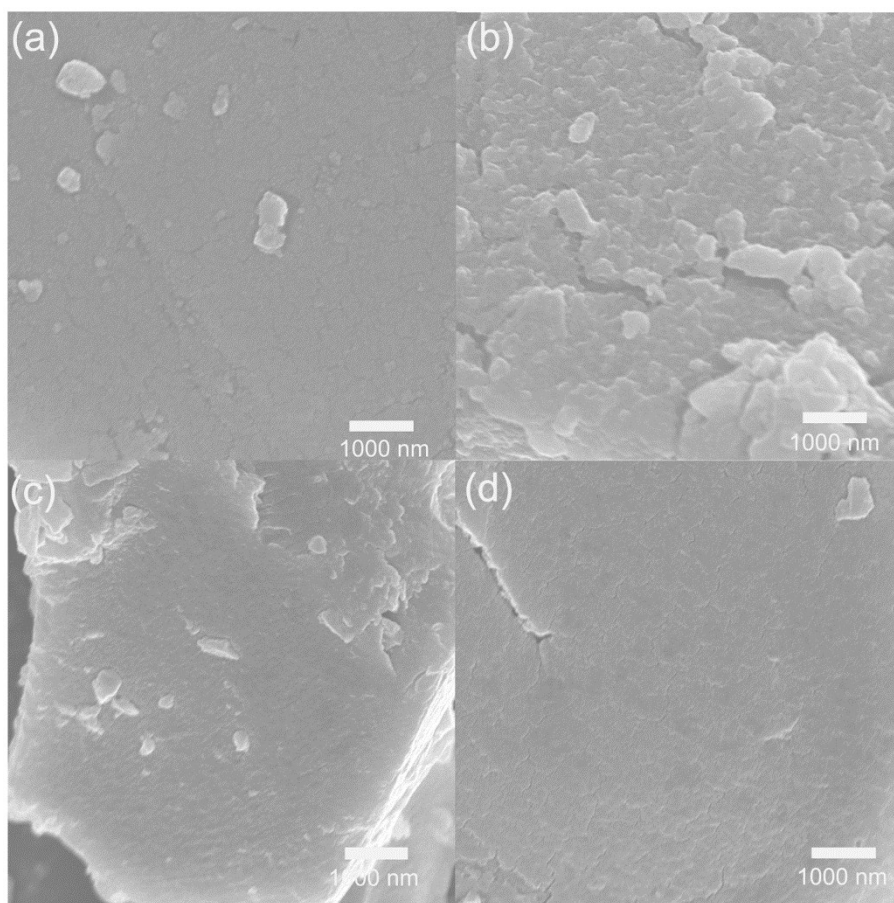

**Fig. S2** The SEM images of  $\text{PMo}_{12}@FeBTC-1$  (a),  $\text{PMo}_{12}@FeBTC-2$  (b),  $\text{PMo}_{12}@FeBTC-3$  (c), and FeBTC (d).

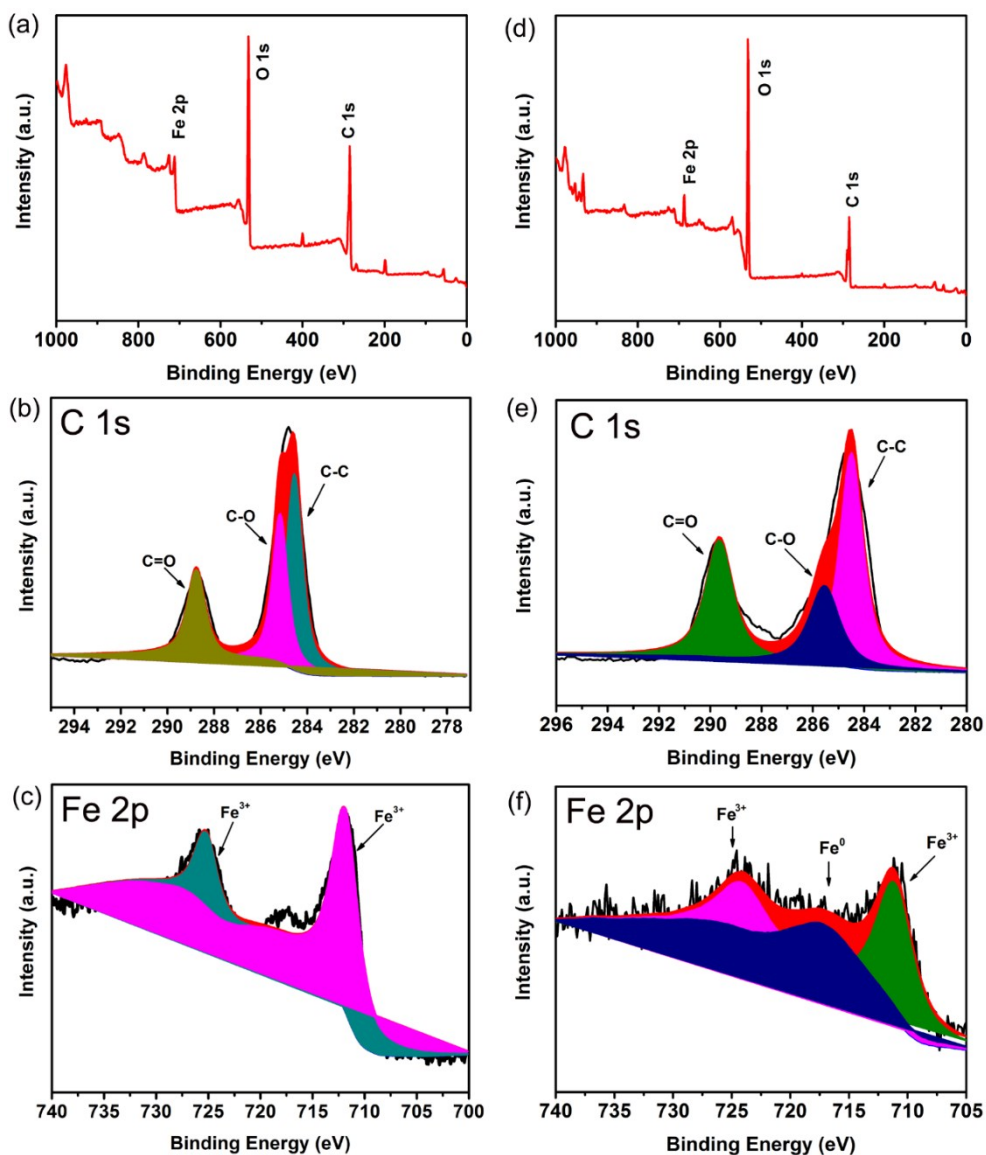

**Fig. S3** XPS spectra of FeBTC before and after discharged to 0.01 V, (a-c): survey scan of as-synthesized FeBTC (a), C 1s (b), and Fe 2p (c), respectively, (d-f): Discharged at 0.01 V, survey scan (d), C 1s (e), and Fe 2p (f), respectively.

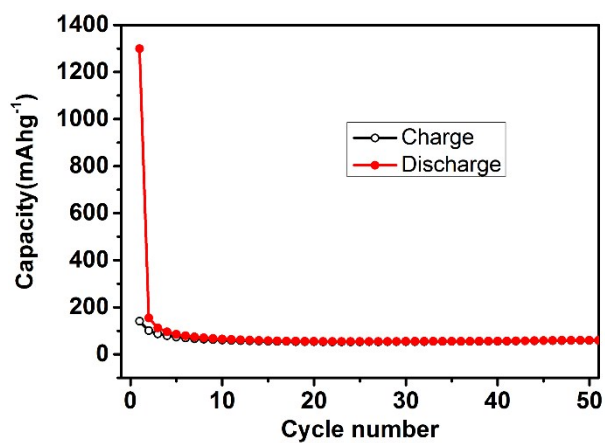

**Fig. S4** Cycling stability of FeBTC at a current density of 100 mA g<sup>-1</sup>.

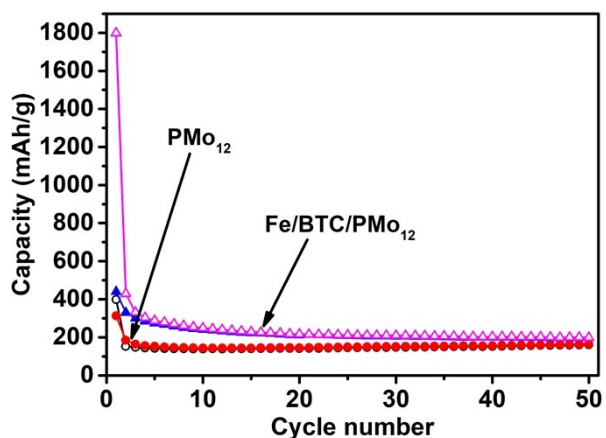

**Fig. S5** Cycling stability of pure PMo<sub>12</sub> as well as the mixture (Fe/BTC/PMo<sub>12</sub>) based on PMo<sub>12</sub>, FeCl<sub>3</sub>·6H<sub>2</sub>O and BTC at a current density of 100 mA g<sup>-1</sup>.

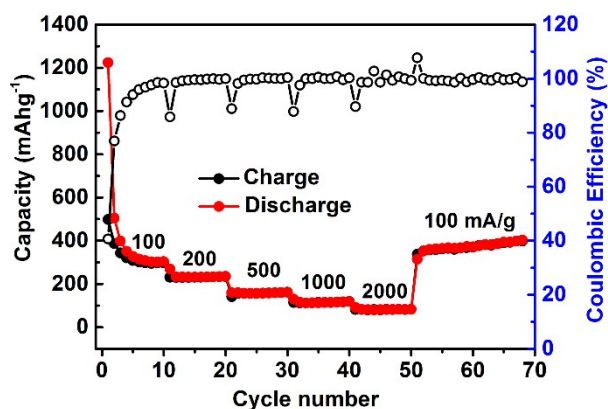

**Fig. S6** Cycle capability test for the PMo<sub>12</sub>@FeBTC-1 at various current densities (0.1-2 A g<sup>-1</sup>).

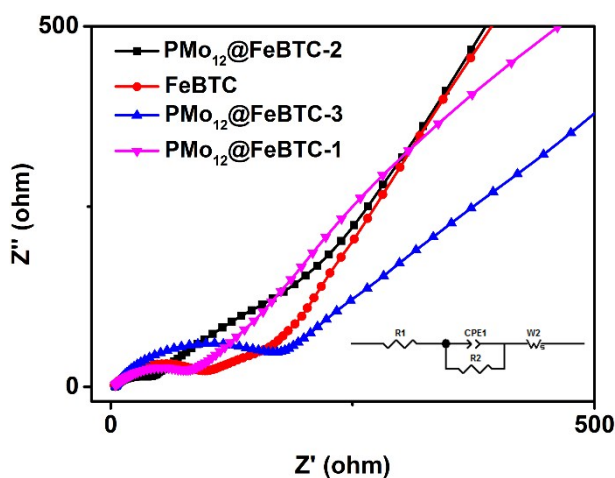

**Fig. S7** Nyquist plots of the PMo<sub>12</sub>@FeBTC-1, PMo<sub>12</sub>@FeBTC-2, PMo<sub>12</sub>@FeBTC-3,

and FeBTC after third cycles.

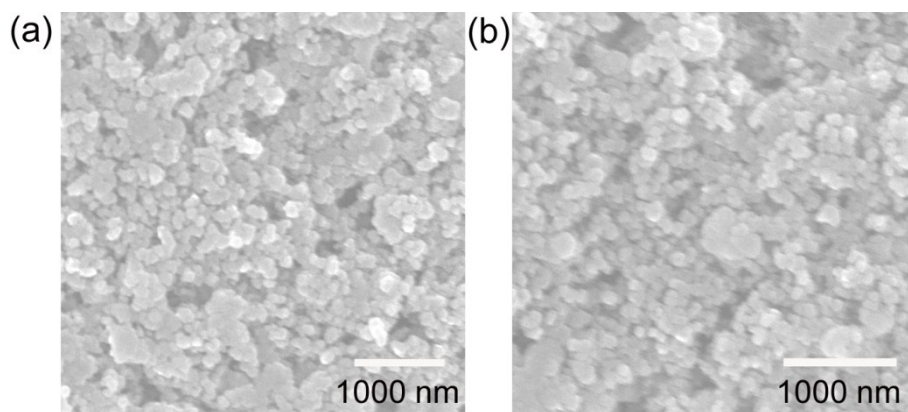

**Fig. S8** SEM images of PMo<sub>12</sub>@FeBTC-2 electrode before (a) and after 100 cycles (b) performed with a current density of 0.5 A g<sup>-1</sup>.

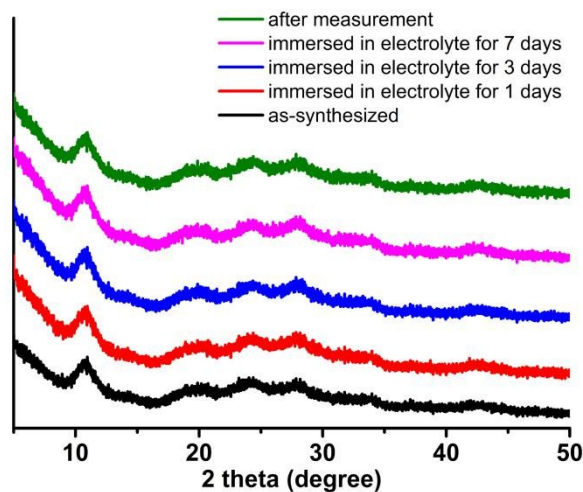

**Fig. S9** PXRD patterns of as-synthesized PMo<sub>12</sub>@FeBTC-2, immersed in electrolyte for 1 day, 3 days, 7 days and after electrochemical measurement.

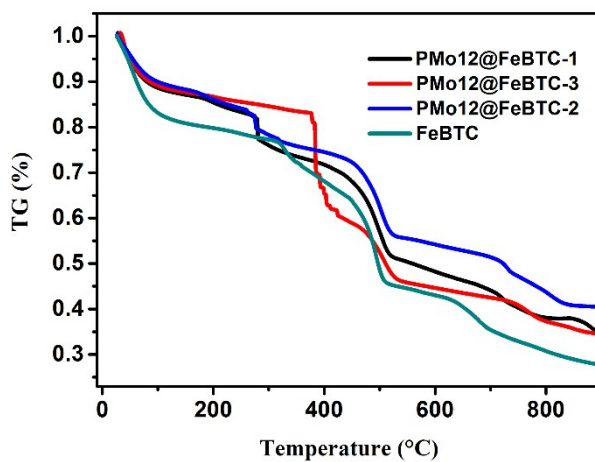

**Fig. S10** TGA results of PMo<sub>12</sub>@FeBTC-1, PMo<sub>12</sub>@FeBTC-2, PMo<sub>12</sub>@FeBTC-3, and FeBTC.

The theoretical capacity has been calculated according to equation 1:

$$Q = \frac{nF}{3.6M} = \frac{96500n}{3.6M} \quad (1)$$

Where  $Q$  is the reversible charging–discharging capacity,  $n$  is the number of electrons passed during the redox reaction, and  $M$  is the molecular weight.

Owing to the intercalation mechanism for Li storage (equation 2), we consider the redox reactions of metal ions Mo, which is also confirmed by the XPS results.

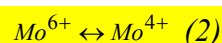

The molecular formula of PMO<sub>12</sub> is H<sub>3</sub>PMo<sub>12</sub>O<sub>40</sub>. If 12 Mo<sup>6+</sup> ions are reduced to Mo<sup>4+</sup>, maximum of  $n = 24$ ,  $Q = 352 \text{ mAh g}^{-1}$

Therefore, the theoretical energy capacity of PMO<sub>12</sub> is 352 mAh g<sup>-1</sup>.

**Table S1 Gelation tests at RT and various Fe:PMo<sub>12</sub> ratios**

| Fe <sup>3+</sup> /mmol | H <sub>3</sub> BTC/mmol | PMo <sub>12</sub> /mmol | Fe:BTC:PMo <sub>12</sub> | Result   | Name                       |
|------------------------|-------------------------|-------------------------|--------------------------|----------|----------------------------|
| 2                      | 0.4                     | 0.05                    | 40:8:1                   | gel      | PMo <sub>12</sub> @FeBTC-1 |
| 2                      | 0.4                     | 0.1                     | 20:4:1                   | gel      | PMo <sub>12</sub> @FeBTC-2 |
| 2                      | 0.4                     | 0.3                     | 20:4:3                   | gel      | PMo <sub>12</sub> @FeBTC-3 |
| 2                      | 0.4                     | 0.5                     | 20:4:5                   | gel      | Not defined                |
| 2                      | 0.4                     | 0.6                     | 20:4:6                   | gel      | Not defined                |
| 2                      | 0.4                     | 0.7                     | 20:4:7                   | solution | Not defined                |
| 2                      | 0.4                     | 0.8                     | 20:4:8                   | solution | Not defined                |
| 2                      | 0.4                     | 0.9                     | 20:4:9                   | solution | Not defined                |

**Table S2 Comparison of PMo<sub>12</sub>@FeBTC-2 with other pristine MOFs and POMs based anodes materials**

| Materials | CD/mA/g | Cycle/RC<br>(mAh/g) | Ref.                        |
|-----------|---------|---------------------|-----------------------------|
| Mn–LCP    | 50      | 50/390              | Inorg. Chem. 2013, 52, 2817 |



|                                             |        |         |                                            |
|---------------------------------------------|--------|---------|--------------------------------------------|
| Mn-BTC                                      | 103    | 100/694 | ACS Appl. Mater. Interfaces 2015, 7, 16357 |
| Zn(IM) <sub>1.5</sub> (abIM) <sub>0.5</sub> | 100    | 200/190 | Chem. Commun. 2015, 51, 697                |
| Asp-Cu                                      | 50     | 200/233 | RSC Adv. 2015, 5, 20386                    |
| POMOF-1                                     | 1.25 C | 500/350 | J. Mater. Chem. A 2015, 3, 22989           |
| Fe/Co-BTC                                   | 200    | 70/639  | Small 2016, 12, 2982                       |
| NENU-507                                    | 100    | 100/640 | Chem. Commun. 2017, 53, 5204               |

---

*RC: Reversible capacity. CD: Current density.*
